# Supplementary material
Source: PubMed Central journal article supplement (PMC3536287)
Supplement: EC.00261-12_zek999094002so1.pdf [file EC.00261-12_zek999094002so1.pdf]

**Table S1. Strains used in this study**

| <i>C. neoformans</i> strains | Genotype                                                                                        | Parent | Reference  |
|------------------------------|-------------------------------------------------------------------------------------------------|--------|------------|
| H99                          | <i>MAT<math>\alpha</math></i>                                                                   |        | (3)        |
| KN99                         | <i>MATa</i>                                                                                     |        | (2)        |
| YSB53                        | <i>MAT<math>\alpha</math> ras1<math>\Delta</math>::NAT STM#150</i>                              | H99    | (1)        |
| YSB42                        | <i>MAT<math>\alpha</math> cac1<math>\Delta</math>::NAT STM#159</i>                              | H99    | (1)        |
| YSB188                       | <i>MAT<math>\alpha</math> pka1<math>\Delta</math>::NAT STM#191</i>                              | H99    | (1)        |
| YSB13                        | <i>MAT<math>\alpha</math> msl1<math>\Delta</math>::NAT STM#123</i>                              | H99    | This study |
| YSB62                        | <i>MATa msl1<math>\Delta</math>::NEO</i>                                                        | KN99a  | This study |
| YSB528                       | <i>MAT<math>\alpha</math> msl1<math>\Delta</math>::NAT STM#123 MSL1-NEO</i>                     | H99    | This study |
| YSB1063                      | <i>MAT<math>\alpha</math> cac2<math>\Delta</math>::NEO</i>                                      | H99    | This study |
| YSB1064                      | <i>MAT<math>\alpha</math> cac2<math>\Delta</math>::NEO</i>                                      | H99    | This study |
| YSB1065                      | <i>MAT<math>\alpha</math> cac2<math>\Delta</math>::NEO</i>                                      | H99    | This study |
| YSB1066                      | <i>MAT<math>\alpha</math> cac2<math>\Delta</math>::NEO</i>                                      | H99    | This study |
| YSB1067                      | <i>MAT<math>\alpha</math> cac2<math>\Delta</math>::NEO</i>                                      | H99    | This study |
| YSB1693                      | <i>MATa cac2<math>\Delta</math>::NEO</i>                                                        | KN99a  | This study |
| YSB1694                      | <i>MATa cac2<math>\Delta</math>::NEO</i>                                                        | KN99a  | This study |
| YSB1695                      | <i>MATa cac2<math>\Delta</math>::NEO</i>                                                        | KN99a  | This study |
| YSB1696                      | <i>MATa cac2<math>\Delta</math>::NEO</i>                                                        | KN99a  | This study |
| YSB1697                      | <i>MAT<math>\alpha</math> msl1<math>\Delta</math>::NAT STM#123 cac2<math>\Delta</math>::NEO</i> | YSB13  | This study |
| YSB1698                      | <i>MAT<math>\alpha</math> msl1<math>\Delta</math>::NAT STM#123 cac2<math>\Delta</math>::NEO</i> | YSB13  | This study |
| YSB1699                      | <i>MAT<math>\alpha</math> msl1<math>\Delta</math>::NAT STM#123 cac2<math>\Delta</math>::NEO</i> | YSB13  | This study |
| YSB1700                      | <i>MAT<math>\alpha</math> msl1<math>\Delta</math>::NAT STM#123 cac2<math>\Delta</math>::NEO</i> | YSB13  | This study |
| YSB1775                      | <i>MAT<math>\alpha</math> PH3::MSL1::NAT</i>                                                    | H99    | This study |
| YSB1776                      | <i>MAT<math>\alpha</math> PH3::MSL1::NAT</i>                                                    | H99    | This study |
| YSB1777                      | <i>MAT<math>\alpha</math> PH3::MSL1::NAT</i>                                                    | H99    | This study |
| YSB1778                      | <i>MAT<math>\alpha</math> PH3::MSL1::NAT</i>                                                    | H99    | This study |
| YSB1779                      | <i>MAT<math>\alpha</math> PH3::MSL1::NAT</i>                                                    | H99    | This study |
| YSB1780                      | <i>MAT<math>\alpha</math> PH3::MSL1::NAT</i>                                                    | H99    | This study |
| YSB1781                      | <i>MAT<math>\alpha</math> PH3::MSL1::NAT</i>                                                    | H99    | This study |
| YSB1782                      | <i>MAT<math>\alpha</math> PH3::MSL1::NAT</i>                                                    | H99    | This study |
| YSB1790                      | <i>MAT<math>\alpha</math> msl1<math>\Delta</math>::NATSTM#123 ras1<math>\Delta</math>::NEO</i>  | YSB13  | This study |
| YSB1918                      | <i>MAT<math>\alpha</math> msl1<math>\Delta</math>::NATSTM#123 MSL1::GFP::NEO</i>                | YSB13  | This study |
| YSB2042                      | <i>MAT<math>\alpha</math> pka1<math>\Delta</math>::NATSTM#191 P<sub>H3</sub>::MSL1::NEO</i>     | YSB188 | This study |
| YSB2043                      | <i>MAT<math>\alpha</math> pka1<math>\Delta</math>::NATSTM#191 P<sub>H3</sub>::MSL1::NEO</i>     | YSB188 | This study |
| YSB2044                      | <i>MAT<math>\alpha</math> pka1<math>\Delta</math>::NATSTM#191 P<sub>H3</sub>::MSL1::NEO</i>     | YSB188 | This study |
| YSB2045                      | <i>MAT<math>\alpha</math> pka1<math>\Delta</math>::NATSTM#191 P<sub>H3</sub>::MSL1::NEO</i>     | YSB188 | This study |
| YSB2046                      | <i>MAT<math>\alpha</math> pka1<math>\Delta</math>::NATSTM#191 P<sub>H3</sub>::MSL1::NEO</i>     | YSB188 | This study |
| YSB2047                      | <i>MAT<math>\alpha</math> cac1<math>\Delta</math>::NATSTM#159 P<sub>H3</sub>::MSL1::NEO</i>     | YSB42  | This study |
| YSB2048                      | <i>MAT<math>\alpha</math> cac1<math>\Delta</math>::NATSTM#159 P<sub>H3</sub>::MSL1::NEO</i>     | YSB42  | This study |
| YSB1084                      | <i>MAT<math>\alpha</math> cac1<math>\Delta</math>::NAT STM#159 msl1<math>\Delta</math>::NEO</i> | YSB42  | This study |
| YSB1085                      | <i>MAT<math>\alpha</math> pka1<math>\Delta</math>::NAT STM#191 msl1<math>\Delta</math>::NEO</i> | YSB188 | This study |
| YSB1086                      | <i>MAT<math>\alpha</math> pka1<math>\Delta</math>::NAT STM#191 msl1<math>\Delta</math>::NEO</i> | YSB188 | This study |

## References

1. **Bahn YS, Hicks JK, Giles SS, Cox GM, Heitman J.** 2004. Adenylyl cyclase-associated protein Aca1 regulates virulence and differentiation of *Cryptococcus neoformans* via the cyclic AMP-protein kinase A cascade. *Eukaryot. Cell* **3**:1476-1491.
2. **Nielsen K, Cox GM, Wang P, Toffaletti DL, Perfect JR, Heitman J.** 2003. Sexual cycle of *Cryptococcus neoformans* var. *grubii* and virulence of congenic a and a isolates. *Infect. Immun.* **71**:4831-4841.
3. **Perfect JR, Ketabchi N, Cox GM, Ingram CW, Beiser CL.** 1993. Karyotyping of *Cryptococcus neoformans* as an epidemiological tool. *J. Clin. Microbiol.* **31**:3305-3309.

**Table S2. Primers used in this study**

| Primer    | Sequence (5' to 3')                             | Comments                                                         |
|-----------|-------------------------------------------------|------------------------------------------------------------------|
| JOHE8994  | TGTGGATGCTGGCGGAGGATA                           | Universal diagnostic primer <sup>a</sup>                         |
| JOHE10425 | TCGCATTGAACCTCGCTC                              | <i>MSL1</i> 5' flanking region primer 1                          |
| JOHE10426 | <u>CTGGCCGTCGTTTTACGGTTT</u> AGTGGTGGCGTATTAC   | <i>MSL1</i> 5' flanking region primer 2 <sup>b</sup>             |
| JOHE10427 | GTCATAGCTGTTTCTGTGAGGACTCCCTATGAAGCC            | <i>MSL1</i> 3' flanking region primer 1 <sup>c</sup>             |
| JOHE10428 | TTCTCCCACTACCCAAACCCCTC                         | <i>MSL1</i> 3' flanking region primer 2                          |
| JOHE10429 | TACGGCATCTCCACCAGTC                             | <i>MSL1</i> diagnostic screening primer 1                        |
| JOHE10430 | CACTCATACCGTTCTCCTGAC                           | <i>MSL1</i> diagnostic screening primer 2                        |
| JOHE11454 | CCATCCATCCATAAACACAC                            | <i>MSL1</i> Southern blot probe primer 1                         |
| JOHE11455 | GATGGTAGTATCCTCACTGCG                           | <i>MSL1</i> Southern blot probe primer 2                         |
| JOHE11725 | CTTGGTGGCAATGAGTTCTGGG                          | <i>MSL1</i> 5'-RACE primer 1                                     |
| Bahn3100  | GCTGTGTATGAGCCAACTCTC                           | <i>MSL1</i> 5'-RACE primer 2                                     |
| Bahn3643  | CCTTCAACTTCTCTGGTCC                             | <i>MSL1</i> 3'-RACE primer 1                                     |
| Bahn3677  | TTGTATCTCTTTCGCCCC                              | <i>MSL1</i> 3'-RACE primer 2                                     |
| Bahn1927  | ATTGCCAAGTGTGTCAGG                              | <i>CAC2</i> 5' flanking region primer 1                          |
| Bahn1928  | CTGGCCGTCGTTTTACGGAAATCGCACGAGTAGAC             | <i>CAC2</i> 5' flanking region primer 2 <sup>b</sup>             |
| Bahn1929  | <u>GTCATAGCTGTTTCTG</u> AAGAAGAAGAGGAGGGTCCG    | <i>CAC2</i> 3' flanking region primer 1 <sup>c</sup>             |
| Bahn1930  | GGCAAACCTCAAAGTCAAGC                            | <i>CAC2</i> 3' flanking region primer 2                          |
| Bahn1931  | TTGCCTTCACTTCTGAGC                              | <i>CAC2</i> diagnostic screening primer                          |
| Bahn1932  | TCTCCCCGTTGTTTTATG                              | <i>CAC2</i> probe primer                                         |
| Bahn4017  | GCATGCAGGATTCGAGTG                              | <i>P<sub>H3</sub></i> :: <i>MSL1</i> primer 1                    |
| Bahn4018  | GTGATAGATGTGTTGTGGTG                            | <i>P<sub>H3</sub></i> :: <i>MSL1</i> primer 2                    |
| Bahn4019  | TACGGCATCTCCACCAGTC                             | <i>P<sub>H3</sub></i> :: <i>MSL1</i> primer 3                    |
| Bahn4020  | CACTCGAATCCTGCATGCTGTGTTTTATGGATGGATG           | <i>P<sub>H3</sub></i> :: <i>MSL1</i> primer 4 <sup>g</sup>       |
| Bahn4021  | <u>CACCACAACACATCTATC</u> ACATGGCCCCAACGAACCTAT | <i>P<sub>H3</sub></i> :: <i>MSL1</i> primer 5 <sup>d</sup>       |
| Bahn4022  | GATGGTAGTATCCTCACTGCG                           | <i>P<sub>H3</sub></i> :: <i>MSL1</i> primer 6                    |
| Bahn4278  | ACATACTCCATCCAGGTCGC                            | <i>P<sub>H3</sub></i> :: <i>MSL1</i> diagnostic screening primer |
| Bahn4112  | <u>CTCGAGTACGGCATCTTCC</u> ACCAGTC              | <i>Msl1</i> ::GFP primer 1 <sup>e</sup>                          |
| Bahn4113  | <u>CCCGGGAGAGCCACC</u> CCACCTCCAAATCCTTTTCATCAA | <i>Msl1</i> ::GFP primer 2 <sup>f</sup>                          |
| Bahn4114  | <u>CCCGGGGTGAGCAAGG</u> CGAGGAGCT               | <i>Msl1</i> ::GFP primer 3 <sup>f</sup>                          |
| Bahn4115  | CTTGTACAGCTCGTCCATGC                            | <i>Msl1</i> ::GFP primer 4                                       |
| Bahn4116  | GCATGGAGCAGCTGTACAAGATGGATGGAGTTTAGGATGC        | <i>Msl1</i> ::GFP primer 5                                       |
| Bahn4545  | TGAGCGGCGGCTCATCGTTCTCCCACTACC                  | <i>Msl1</i> ::GFP primer 6 <sup>g</sup>                          |
| Bahn3066  | CTCTATTCTTTCGCACGTT                             | <i>HSP78</i> qRT-PCR primer 1                                    |
| Bahn3067  | AAGGATGATGGAAGCGGGAAGC                          | <i>HSP78</i> qRT-PCR primer 2                                    |
| Bahn3068  | ATGGAAGAATGCGGGAGCC                             | <i>SNF3</i> qRT-PCR primer 1                                     |
| Bahn3069  | CATTCTGGTCAATCGCAAG                             | <i>SNF3</i> qRT-PCR primer 2                                     |
| Bahn3070  | ATCTGGAAAAGTCTGTC                               | <i>AGX1</i> qRT-PCR primer 1                                     |
| Bahn3071  | CAACGCATTACAGTTTGGC                             | <i>AGX1</i> qRT-PCR primer 2                                     |
| Bahn3072  | TGGTTCTTATTCCTGTGG                              | <i>SSL1</i> qRT-PCR primer 1                                     |
| Bahn3073  | CATCGGAAAACCTGCTATC                             | <i>SSL1</i> qRT-PCR primer 2                                     |
| Bahn3074  | GGATGGAACTTCGTAGCAAC                            | <i>YVC1</i> qRT-PCR primer 1                                     |
| Bahn3075  | GGTATTCGTCCGTCTCATTATC                          | <i>YVC1</i> qRT-PCR primer 2                                     |
| Bahn3076  | TGATTGTGCTCTCTGAGCT                             | <i>GDB1</i> qRT-PCR primer 1                                     |
| Bahn3077  | TCAAGGGTCTTCATACCAAG                            | <i>GDB1</i> qRT-PCR primer 2                                     |
| Bahn3078  | ATTCTGAAGTATTGAGGCTACG                          | <i>PMP3</i> qRT-PCR primer 1                                     |
| Bahn3079  | TAACATACAATCTCCCTGCC                            | <i>PMP3</i> qRT-PCR primer 2                                     |
| Bahn3080  | TTGCTGCGTTTGACCAACC                             | <i>CAN2</i> qRT-PCR primer 1                                     |
| Bahn3081  | GGCAAAGAATGCTTCAACC                             | <i>CAN2</i> qRT-PCR primer 2                                     |
| Bahn3082  | ACGACAACCAGGAGTCTCTT                            | <i>HSP12</i> qRT-PCR primer 1                                    |
| Bahn3083  | GTTTCTACACCATTGTTTA                             | <i>HSP12</i> qRT-PCR primer 2                                    |
| Bahn3086  | AGCCCACTGCTGTGGATG                              | <i>VPS55</i> qRT-PCR primer 1                                    |
| Bahn3087  | AACTTCTCCTCGTTACCACC                            | <i>VPS55</i> qRT-PCR primer 2                                    |
| Bahn3513  | CCTTTCCTCTATGACACCG                             | <i>MSL1</i> Northern blot probe primer 1                         |
| Bahn3514  | CTGTGAGGCGTCAGTCTTAC                            | <i>MSL1</i> Northern blot probe primer 2                         |
| Bahn3495  | CTTCTCAACCTGGCAAAG                              | <i>HSP78</i> Northern blot probe primer 1                        |
| Bahn3496  | TTCGGTCTTACCTACACCAG                            | <i>HSP78</i> Northern blot probe primer 2                        |
| Bahn3511  | CCACTACTACCACCCCAAC                             | <i>HSP12</i> Northern blot probe primer 1                        |
| Bahn3512  | CAGTAAGAGACTCTGGTTGTC                           | <i>HSP12</i> Northern blot probe primer 2                        |

<sup>a</sup> Binding to *ACT1* promoter regions of the Nat<sup>r</sup> or Neo<sup>r</sup> marker<sup>b</sup> The reverse-complementary sequence of M13 forward (M13F) primer is underlined.<sup>c</sup> The reverse-complementary sequence of M13 reverse (M13R) primer is underlined.

- <sup>d</sup> Binding to H3 promoter
- <sup>e</sup> XhoI site is underlined.
- <sup>f</sup> XmaI site is underlined.
- <sup>g</sup> NotI site is underlined.

**Table S4. List of Msl1-regulated genes having unknown functions**

| H99 ID (CNAG) | Fold change <sup>a</sup> | KOG Functional description                                           |
|---------------|--------------------------|----------------------------------------------------------------------|
| 07367         | -3.913                   | Amino acid transporters                                              |
| 05276         | -1.463                   | Histone deacetylase complex, catalytic component RPD3                |
| 03454         | -1.273                   | None                                                                 |
| 01494         | -1.24                    | None                                                                 |
| 06759         | -1.236                   | Zinc-binding oxidoreductase                                          |
| 04322         | -1.012                   | None                                                                 |
| 06220         | -0.968                   | 1 FOG: Zn-finger                                                     |
| 01348         | -0.927                   | None                                                                 |
| 06453         | -0.913                   | Peripheral-type benzodiazepine receptor and related proteins         |
| 04417         | -0.896                   | None                                                                 |
| 00984         | -0.866                   | Reductases with broad range of substrate specificities               |
| 06117         | -0.847                   | None                                                                 |
| 01743         | -0.831                   | None                                                                 |
| 07856         | -0.661                   | None                                                                 |
| 03595         | -0.634                   | Uncharacterized conserved protein                                    |
| 01735         | -0.612                   | Cystathionine beta-lyases/cystathionine gamma-synthases              |
| 02722         | -0.596                   | Aldo/keto reductase family proteins                                  |
| 00283         | 0.611                    | Phospholipase C                                                      |
| 02484         | 0.612                    | Cyclophilin type peptidyl-prolyl cis-trans isomerase                 |
| 05534         | 0.644                    | Voltage-gated shaker-like K <sup>+</sup> channel, subunit beta/KCNAB |
| 01993         | 0.669                    | None                                                                 |
| 00663         | 0.697                    | None                                                                 |
| 01540         | 0.79                     | Predicted oxidoreductase                                             |
| 04631         | 0.859                    | Ribulose kinase and related carbohydrate kinases                     |
| 03599         | 0.88                     | None                                                                 |
| 06431         | 0.902                    | Short-chain acyl-CoA dehydrogenase                                   |
| 07837         | 0.923                    | None                                                                 |
| 05305         | 1.013                    | DNA damage inducible protein                                         |
| 05184         | 1.207                    | Glycosyl transferase, family 8 - glycogenin                          |
| 05461         | 1.366                    | Glycolate oxidase                                                    |
| 05258         | 1.519                    | None                                                                 |
| 05256         | 1.687                    | Catalase                                                             |
| 00269         | 1.733                    | Sorbitol dehydrogenase                                               |
| 04025         | 1.907                    | Transaldolase                                                        |
| 05831         | 1.96                     | Putative translation initiation inhibitor UK114/IBM1                 |
| 04197         | 2.133                    | Dual-specificity tyrosine-phosphorylation regulated kinase           |

a, Fold change indicates  $\text{Log}_2$  (*msl1Δ*/WT). Genes showing more than 1.5-fold expression changes are listed.

Figure S1 (Yang et al. 2012)

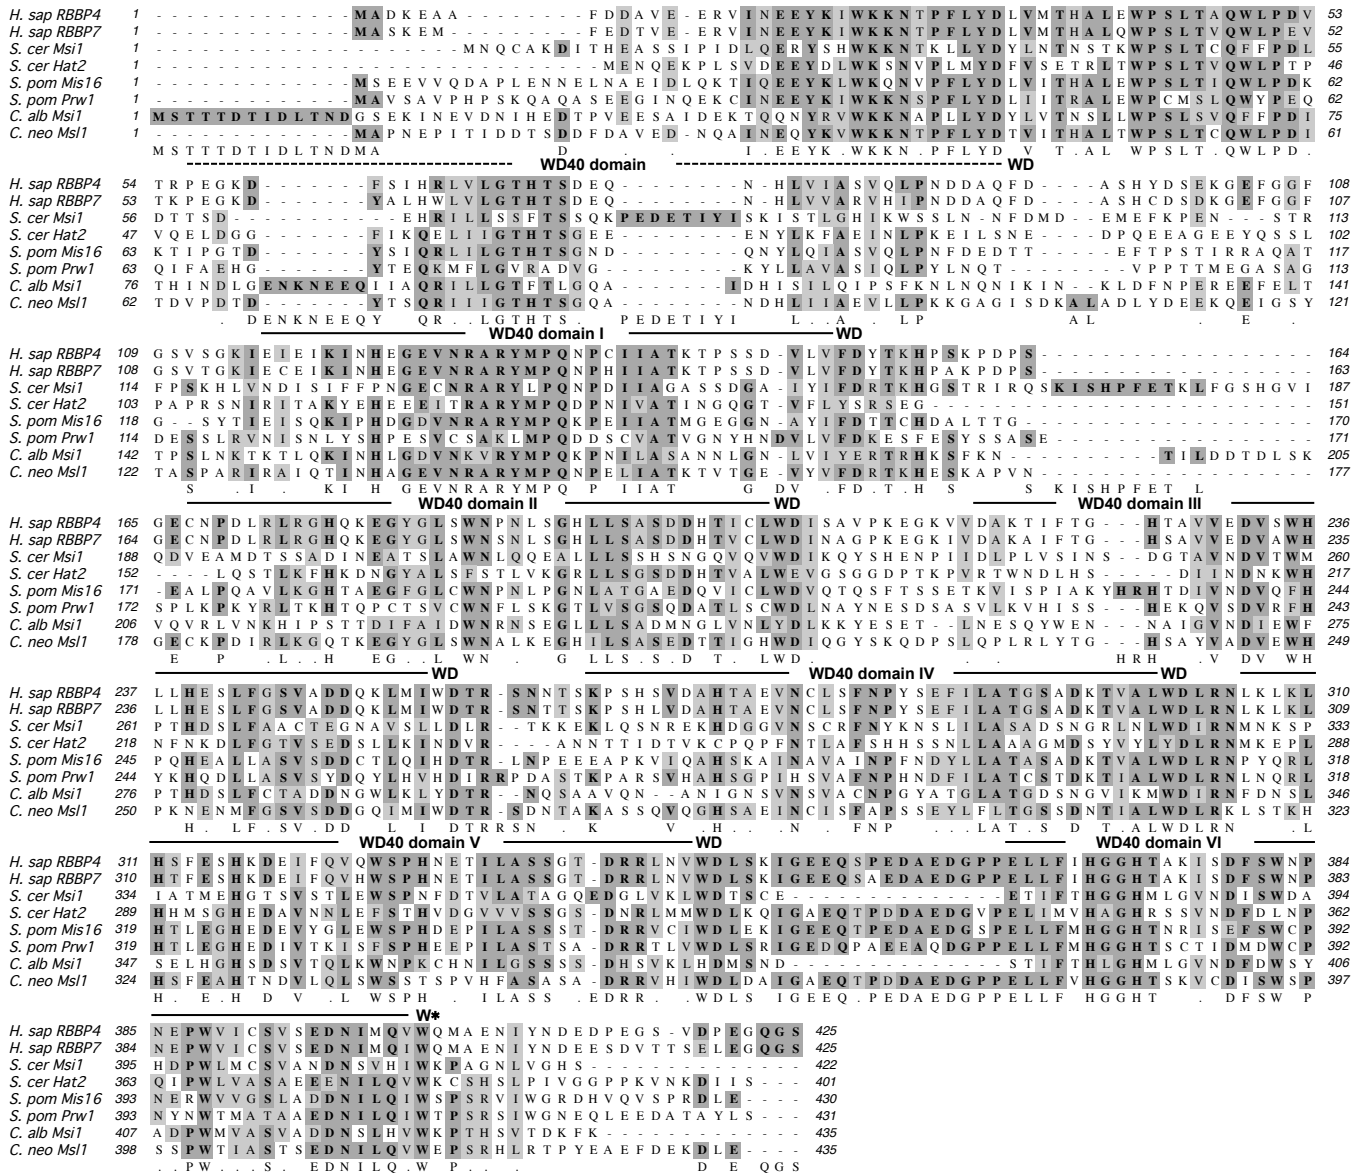

Fig S1. Alignment of MSIL proteins from several fungi and human. Multiple sequence alignment is depicted by Clustal W alignment from MacVector software (versions 7.2.3, Accelrys). The WD40 domains were marked based on the known WD40 domains in human homologs RBBP4 and RBBP7. *H. sap* RBBP4, NP\_005601.1; *H. sap* RBBP7, NP\_002884.1; *S. cer* Msi1, NP\_009754; *S. cer* Hat2, NP\_010858.3; *S. pom* Prw1, NP\_594864.1; *S. pom* Mis16, NP\_587881.1; *C. alb* Msi1, XP\_715003; *C. neo* Msi1, CNAG\_03297.2.

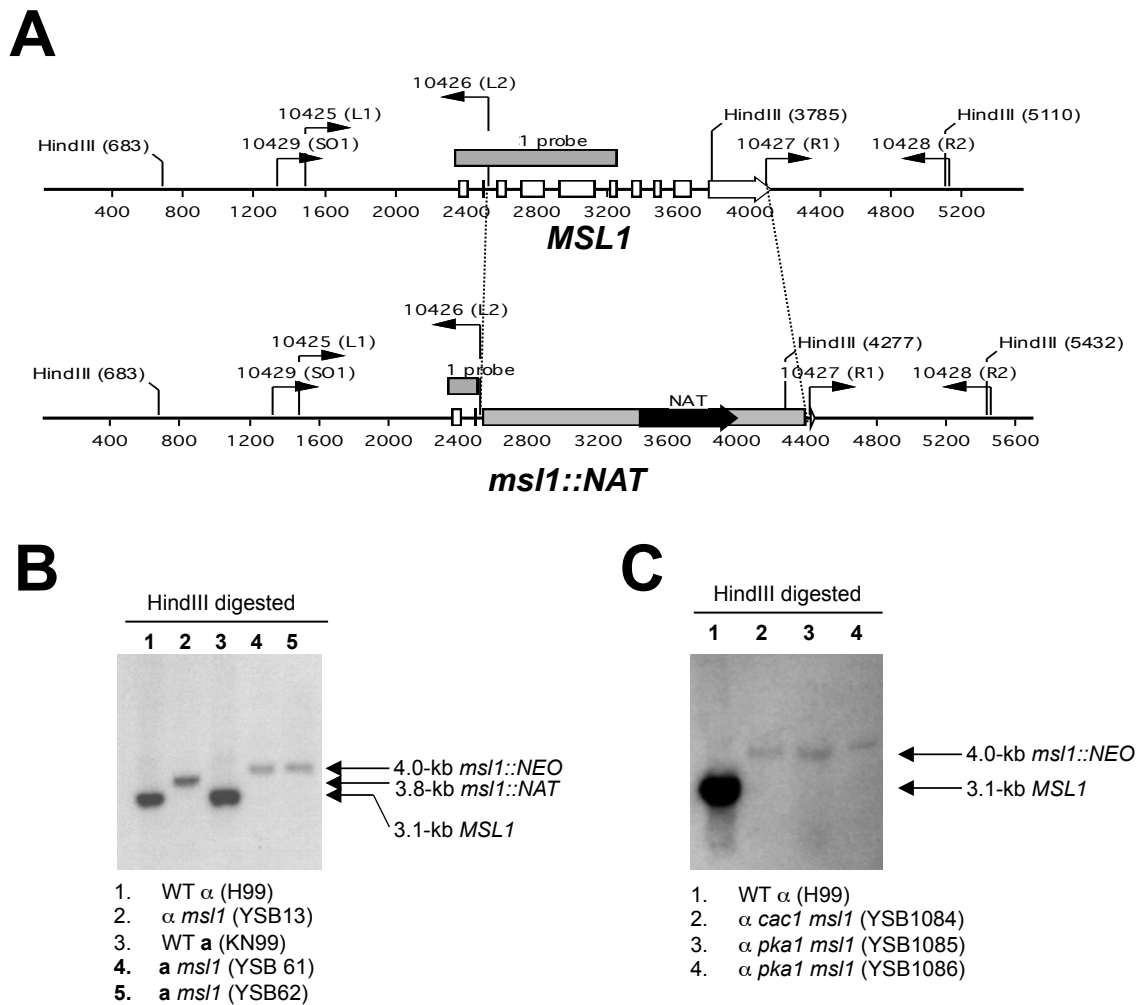

Fig S2. Disruption of the *MSL1* gene. (A) The *MSL1* disruption strategy. The genomic DNA structure of the *MSL1* gene is illustrated as white boxes for the first 9 exons and an arrow for exon 10 indicating the direction of transcription. Primers for overlap PCR and diagnostic PCR are indicated as bent arrows. (B) Southern blot analysis with HindIII-digested genomic DNA of wild-type  $\alpha$  (H99, lane 1) and **a** (KN99a, lane 3) strains,  $\alpha$  and **a** *msl1*Δ mutants (YSB13, lane 2; YSB61, lane 4; YSB61, lane 5) was performed with the *MSL1*-specific probe. (C) Southern blot analysis of *cac1*Δ *msl1*Δ and *pka1*Δ *msl1*Δ mutants was performed with HindIII-digested genomic DNA of wild type  $\alpha$  strain (H99, lane 1),  $\alpha$  *cac1*Δ *msl1*Δ mutant (YSB1084, lane 2),  $\alpha$  *pka1*Δ *msl1*Δ mutants (YSB1085, lane 3; YSB1086, lane 4).

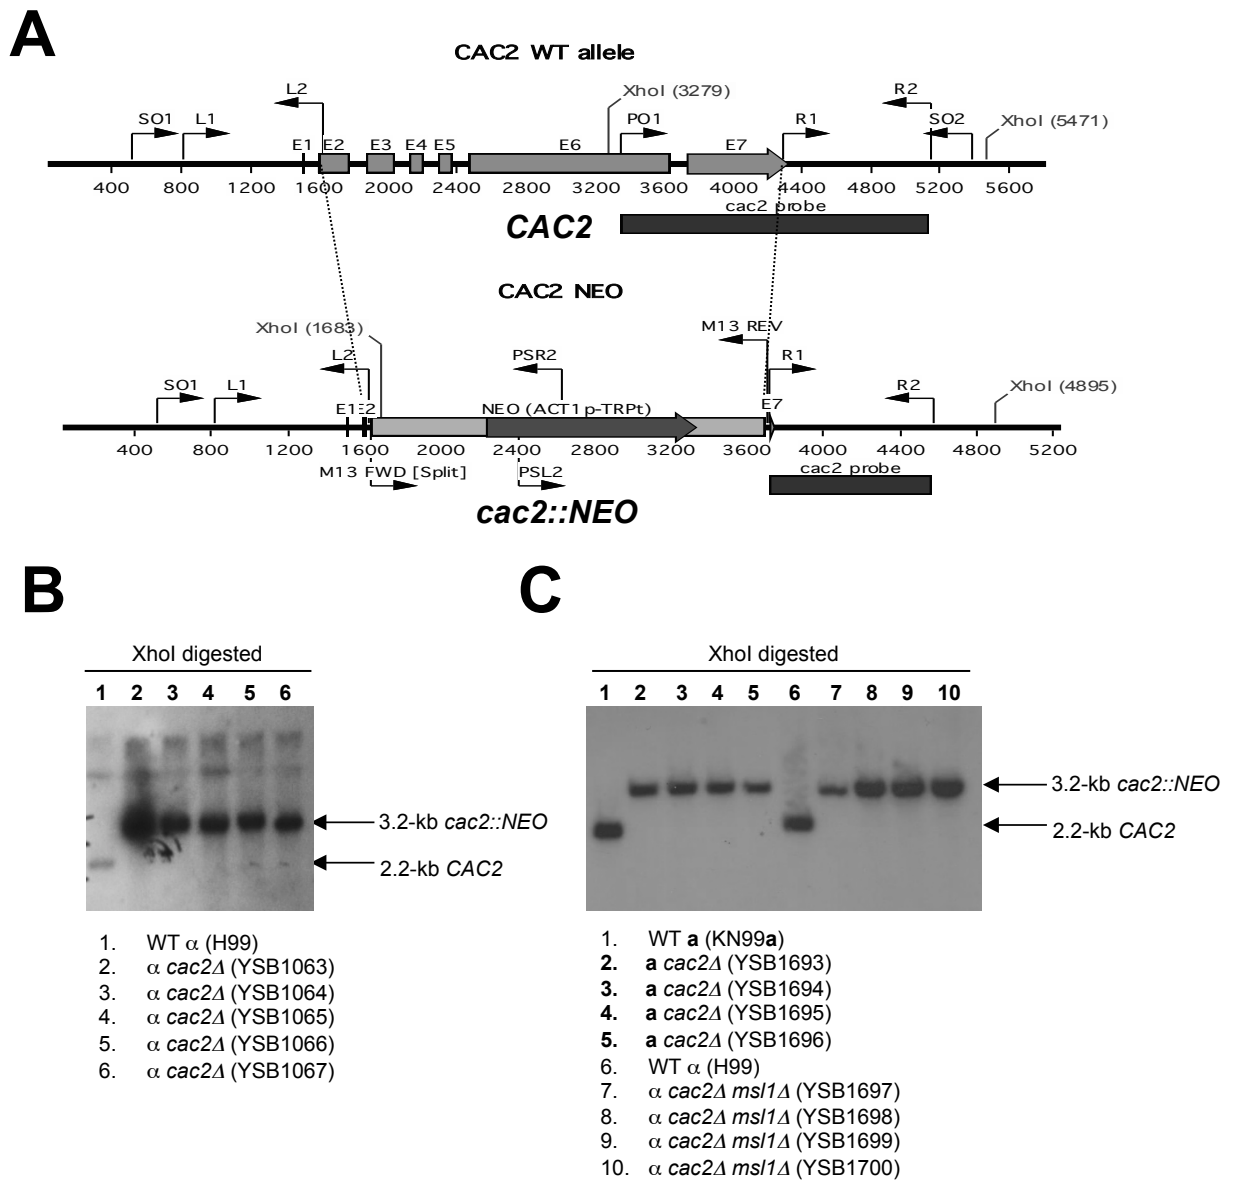

Fig S2. Disruption of the *CAC2* gene. (A) The *CAC2* disruption strategy. The genomic DNA structure of the *CAC2* gene is illustrated as shade boxes for the first 6 exons and an arrow for exon 7 indicating the direction of transcription. Primers for overlap PCR and diagnostic PCR are indicated as bent arrows. (B) Southern blot analysis with XhoI-digested genomic DNA of wild-type  $\alpha$  strain (H99, lane 1),  $\alpha$  *cac2* $\Delta$  mutants (YSB1063, lane 2; YSB1064, lane 3; YSB1065, lane 4; YSB1066, lane 5; YSB1067, lane 6) was performed with the *CAC2*-specific probe. (C) Southern blot analysis of **a** *cac2* $\Delta$  and  $\alpha$  *cac2* $\Delta$  *msl1* $\Delta$  was performed with XhoI-digested genomic DNA of wild-type **a** and  $\alpha$  (KN99a, lane 1; H99, lane 6), **a** *cac2* $\Delta$  mutants (YSB1693, lane 2; YSB1694, lane 3; YSB1695, lane 4; YSB1696, lane 5),  $\alpha$  *cac2* $\Delta$  *msl1* $\Delta$  mutants (YSB1697, lane 7; YSB1698, lane 8; YSB1699, lane 9; YSB1700, lane 10).



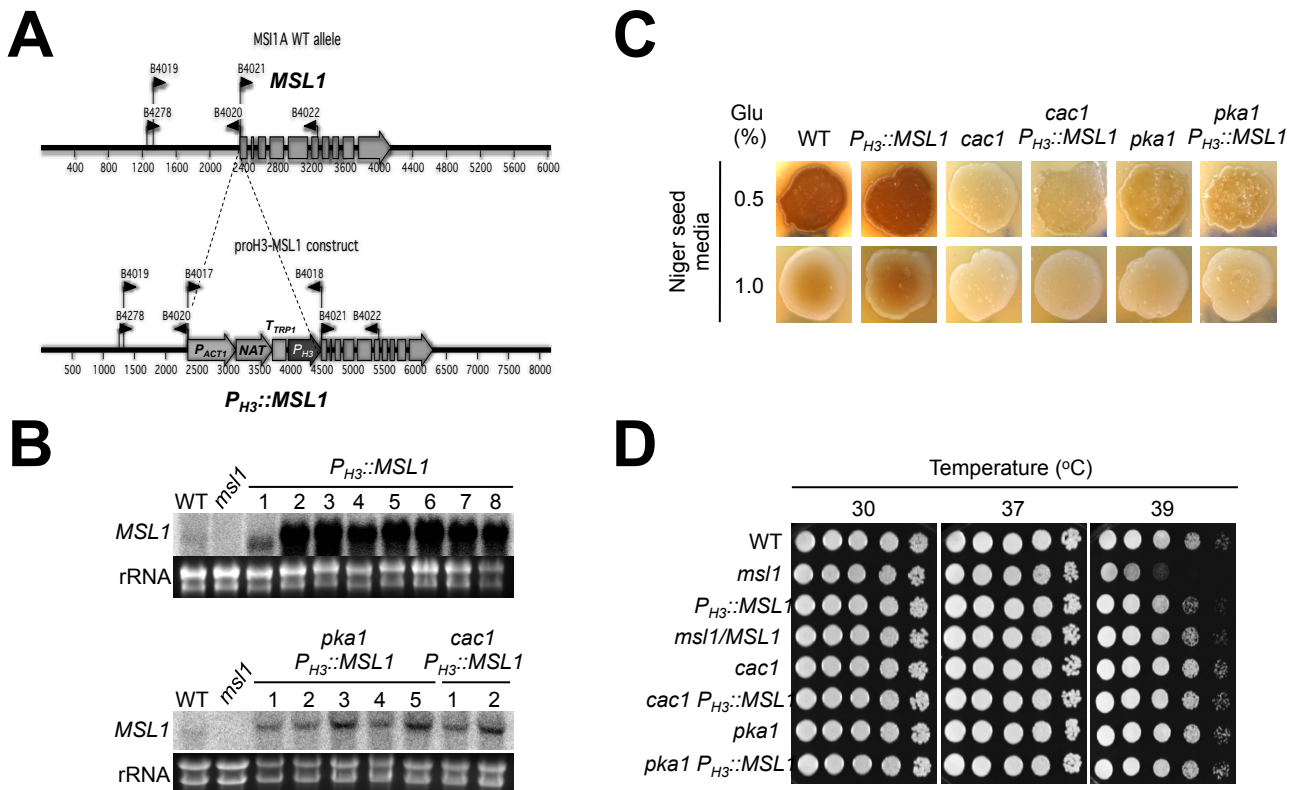

Fig S4. Construction and phenotypic analysis of *MSL1* overexpression strains.

(A) The construction strategy for the *MSL1* overexpression strains. The primers for overlap PCR and diagnostic PCR are indicated as bent arrow. The first arrow box on the *P<sub>H3</sub>::MSL1* construct indicates the *ACT1* promoter. The shade arrow box named *NAT* indicates the *NAT* (nourseothricin acetyltransferase) gene. The shade box next to the *NAT* gene indicates the *TRP1* terminator. The dark box named H3 indicates the histone H3 promoter. The *P<sub>H3</sub>::MSL1*, the *pka1Δ P<sub>H3</sub>::MSL1*, and the *cac1Δ P<sub>H3</sub>::MSL1* strains were confirmed by Southern blot analysis and the overexpression of *MSL1* was verified by Northern blot analysis with RNA extracted from wild-type (H99), *msl1Δ* (YSB13), *P<sub>H3</sub>::MSL1* (YSB1775, lane 1; YSB1776, lane 2; YSB1777, lane 3; YSB1778, lane 4; YSB1779, lane 5; YSB1780, lane 6; YSB1781, lane 7; YSB1782, lane 8), *pka1Δ P<sub>H3</sub>::MSL1* (YSB2042, lane 1; YSB2043, lane 2; YSB2044, lane 3; YSB2045, lane 4; YSB2046, lane 5), and *cac1Δ P<sub>H3</sub>::MSL1* (YSB2047, lane 1; YSB2048, lane 2). Note that *MSL1* overexpression levels were lower in the cAMP mutant backgrounds (both *cac1Δ* and *pka1Δ* mutants) than in WT, indicating that the *H3* promoter may be under control of the cAMP pathway. (B) The following strains were spotted and grown on Niger seed agar medium (0.5 % and 1.0 % glucose) at 30°C for 3 days and photographed: WT H99 strain, *P<sub>H3</sub>::MSL1* (YSB1776), *cac1Δ*, *cac1Δ P<sub>H3</sub>::MSL1* (YSB2047), *pka1Δ*, *pka1Δ P<sub>H3</sub>::MSL1* (YSB2042). (C) Each *C. neoformans* strain [WT H99 strain, *P<sub>H3</sub>::MSL1* (YSB1776), *cac1Δ*, *cac1Δ P<sub>H3</sub>::MSL1* (YSB2047), *pka1Δ*, *pka1Δ P<sub>H3</sub>::MSL1* (YSB2042)] was cultured overnight at 30°C in liquid YPD medium, 10-fold serially diluted (1-10<sup>-4</sup> dilutions) and spotted (3 μl of dilution) on YPD agar medium and then further incubated at 37°C and 39°C for 2 days to monitor thermotolerance.
